# Supplementary material
Source: PubMed Central journal article supplement (PMC6441547)
Supplement: NIHMS1014413-supplement-supplemental.pdf [file NIHMS1014413-supplement-supplemental.pdf]

Cell Reports, Volume 26

**Supplemental Information**

***An Acinetobacter baumannii*, Zinc-Regulated  
Peptidase Maintains Cell Wall Integrity  
during Immune-Mediated Nutrient Sequestration**

**Zachery R. Lonergan, Brittany L. Nairn, Jiefei Wang, Yen-Pang Hsu, Laura E. Hesse, William N. Beavers, Walter J. Chazin, Jonathan C. Trinidad, Michael S. VanNieuwenhze, David P. Giedroc, and Eric P. Skaar**

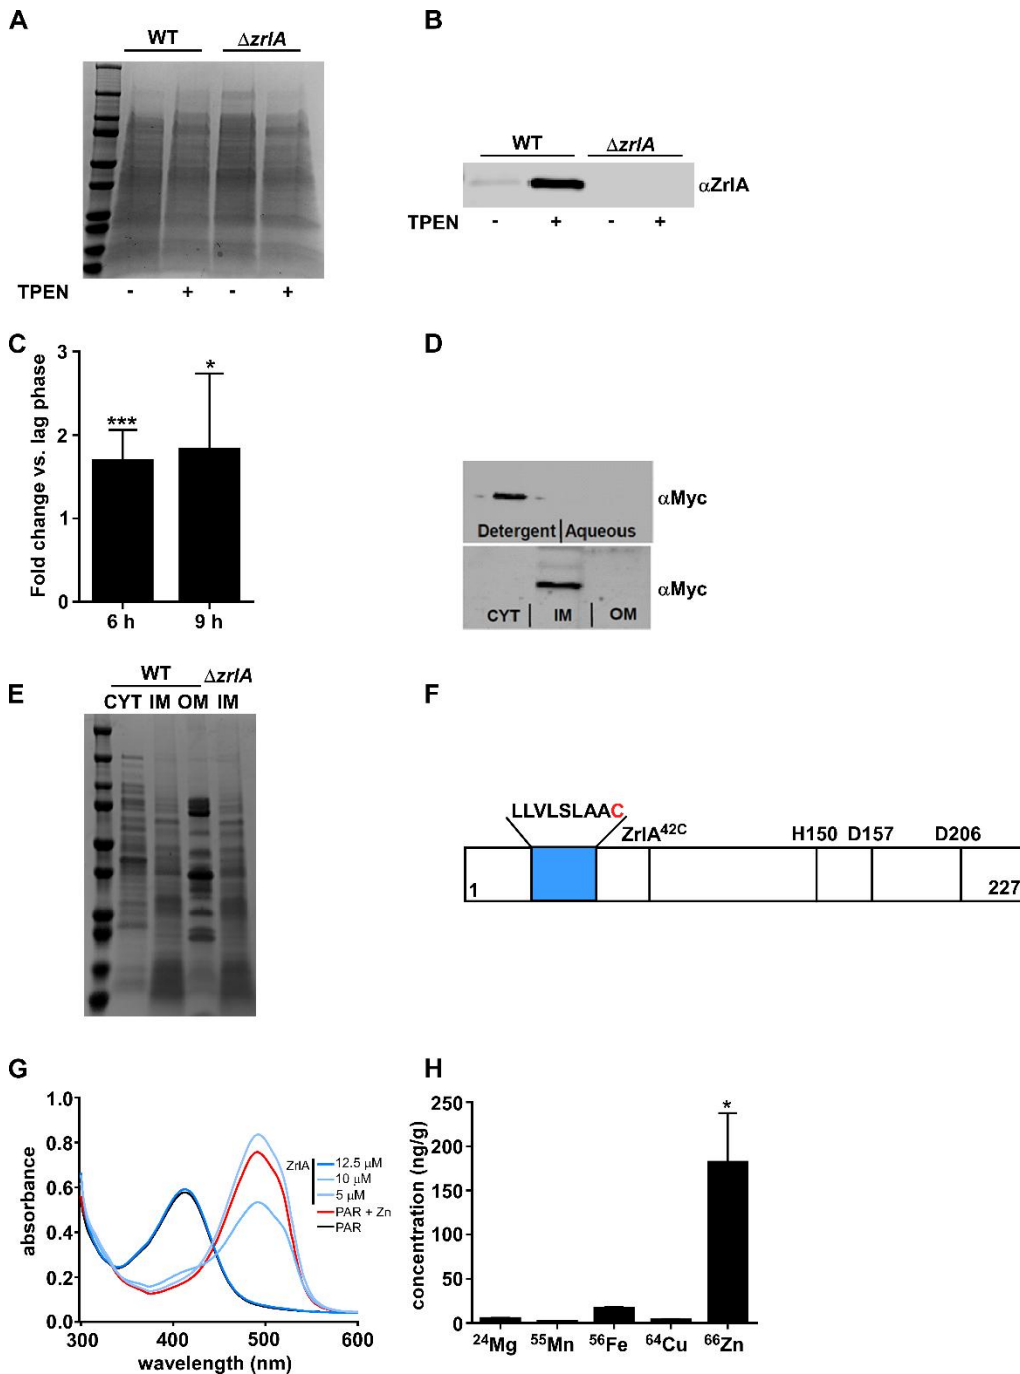

**Figure S1.** ZrIA is a zinc-binding inner membrane lipoprotein. Related to Figure 1. A) SDS-PAGE analysis to assess total protein levels corresponding to the immunoblot in Fig 1A. B) Immunoblot on protein lysates from WT or  $\Delta zrlA$  cells grown for 6 hours  $\pm$  40  $\mu M$  TPEN (25  $\mu g$  protein/lane). C) Relative expression of *zrlA* as determined by qRT-PCR on WT *A. baumannii* at 6 h and 9 h of growth compared to 2 h. \*  $p < 0.05$ , \*\*\*  $p < 0.001$  as determined by Student's *t* test from three independent experiments, mean  $\pm$  SD. D) Immunoblot of membrane fractionations (15  $\mu g$  protein/lane) reveals ZrIA<sup>myc</sup> localizes to the detergent phase and localizes to the inner membrane. E) SDS-PAGE analysis to assess total protein levels corresponding to the immunoblot in Fig 1D. F) Schematic of ZrIA, with the predicted lipobox denoted as a blue square and the conserved lipid-anchoring cysteine in red. The approximate N-terminus of the ZrIA<sup>42C</sup> variant is indicated (residues 42-227). H150, D157, and D206 are the predicted metal-coordinating residues. G) Incubation of 20  $\mu M$  4-(2-pyridylazo)-resorcinol (PAR) with 10  $\mu M$  Zn results in an absorbance shift of PAR from 410 nm to 500 nm; the addition of increasing concentrations of recombinant ZrIA from 5  $\mu M$  to 12.5  $\mu M$  results in return in absorbance to 410 nm. H) Recombinant ZrIA was analyzed by ICP-MS for associated Mg, Mn, Fe, Cu, and Zn concentrations. \*  $p < 0.05$  as determined by one-way ANOVA with Tukey multiple comparisons test from three independent experiments, mean  $\pm$  SD.

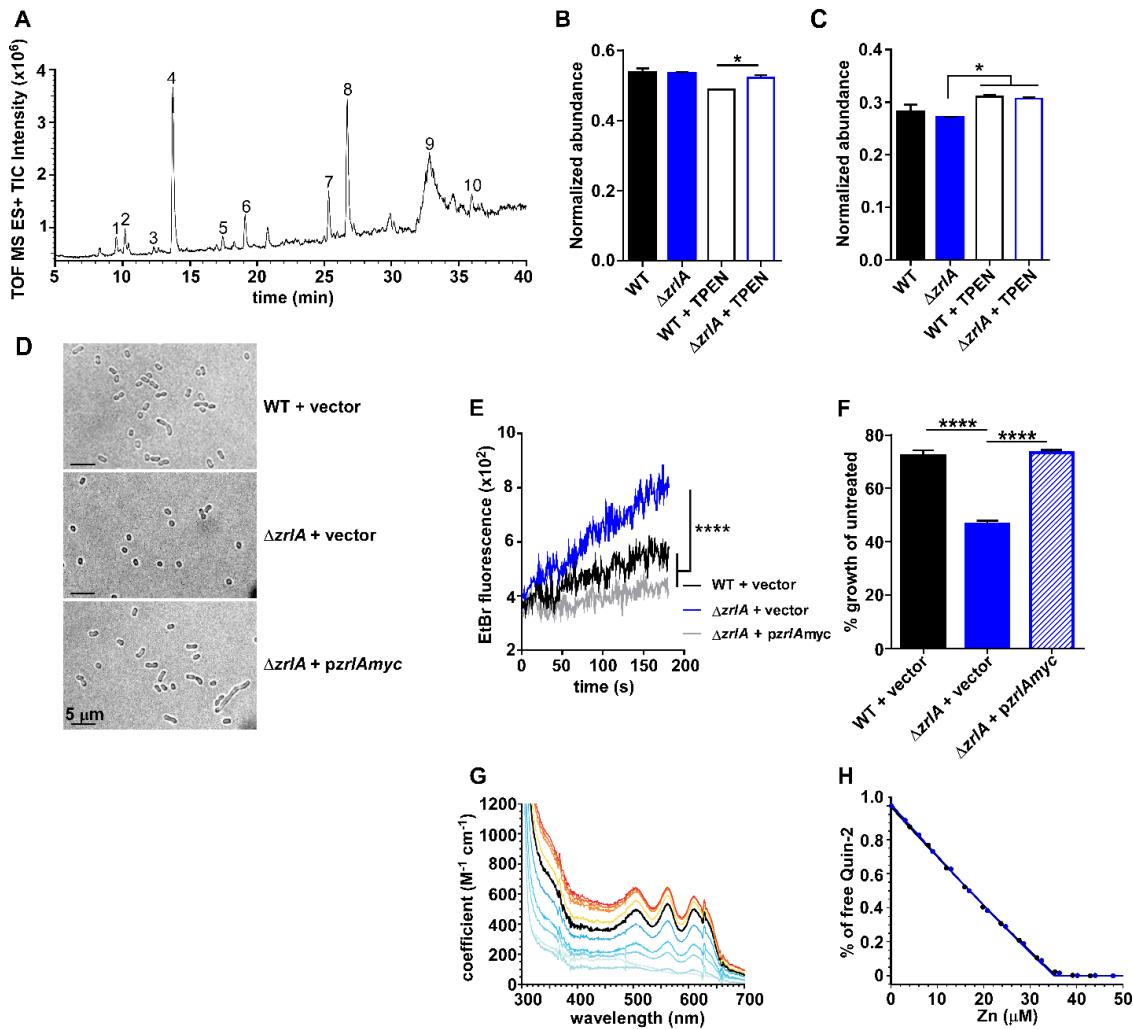

**Figure S2.** ZrIA contributes to PG homeostasis and cellular morphology. Related to Figure 2. A) Representative total ion chromatogram (TIC) and accompanying UPLC-MS analysis of a mucopeptide profile of *A. baumannii* ATCC 17978  $\Delta zrlA$  grown with 40  $\mu\text{M}$  TPEN treatment. Other TICs were obtained for the WT strain grown with 40  $\mu\text{M}$  TPEN. See **Table S1** for corresponding peak descriptions of peaks labeled 1-10 including molecular composition, retention time, theoretical  $m/z$ , experimental  $m/z$  and difference in  $m/z$ . Note that peaks 1-2 (monomeric trimers) and 3-4 (monomeric tetramers include mucopeptides that harbor a disaccharide or monosaccharide (–GlcNAc) sugar moiety (see Table S1 for details). B) Normalized abundance of mucopeptide tetrapeptide monomers [sum M4,M4(–GlcNAc)] (Figure S2, Table S1) in WT or  $\Delta zrlA \pm 40 \mu\text{M}$  TPEN. C) Normalized abundance of mucopeptide dimeric tetrapeptides crosslinks (sum D44, M44; Figure S2, Table S1) in WT or  $\Delta zrlA \pm 40 \mu\text{M}$  TPEN. \*  $p < 0.05$  as determined by one-way ANOVA with Tukey multiple comparisons test on biological duplicates, mean  $\pm$  SD. D) Live-cell imaging of WT + vector,  $\Delta zrlA$  + vector, or  $\Delta zrlA$  + *pzrlAmyc* following growth in LB Carb75 (100X). Scale bar is 5  $\mu\text{m}$ . E) Ethidium bromide uptake assessed over time in WT + vector,  $\Delta zrlA$  + vector, or  $\Delta zrlA$  + *pzrlAmyc* following growth in LB Carb75. \*\*\*\*  $p < 0.0001$  as determined by Student's  $t$  test on mean line slope from three independent experiments. F) WT + vector,  $\Delta zrlA$  + vector, and  $\Delta zrlA$  + *pzrlAmyc* were grown in 0.01 % SDS. Graph depicts percent growth relative to untreated strains at eight hours. \*\*\*  $p < 0.001$  as determined by one-way ANOVA with Tukey multiple comparisons test from three independent experiments, mean  $\pm$  SD. G) Co(II) titration of apo A1S<sub>1248</sub><sup>56C</sup> with the spectra colored as a function of the Co(II):protein ratio as in Fig 2E, main text: cyan, less than 1 mol-equivalent Co(II); black, 1:1 mol ratio; tan to orange, greater than 1:1 mol ratio. H) Replicate normalized titrations (black, blue filled symbols) of Zn(II) into a solution of the quin-2 and A1S<sub>1248</sub><sup>56C</sup>, with the continuous lines individual fits to a 1:1 binding model. 12.4  $\mu\text{M}$  A1S<sub>1248</sub><sup>56C</sup> with 22.4  $\mu\text{M}$  quin-2 (black filled circles) and 15.0  $\mu\text{M}$  A1S<sub>1248</sub><sup>56C</sup> with 20.2  $\mu\text{M}$  quin-2 (blue filled circles). The average  $K_{Zn}$  of  $2.2 (\pm 0.1) \times 10^{11} \text{M}^{-1}$ .

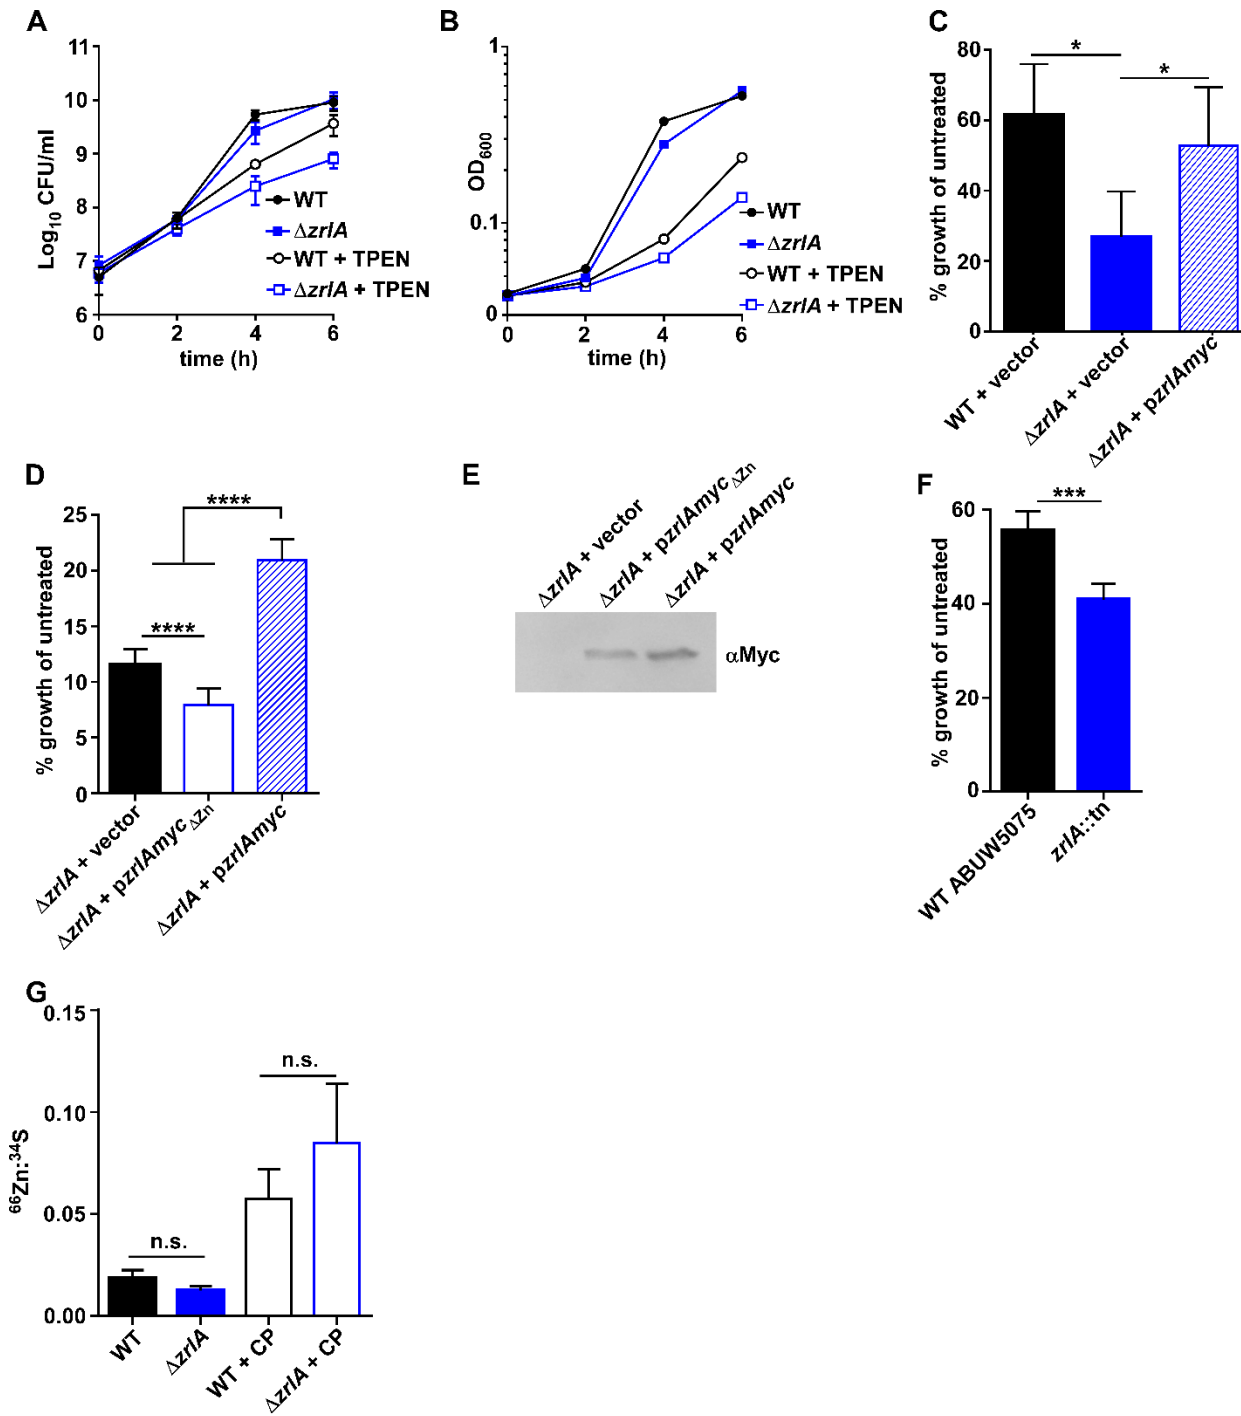

**Figure S3.** ZrIA is critical for full growth in low Zn. Related to Figure 3. A) Colony forming units (CFU) were monitored over time for WT or  $\Delta zrlA$   $\pm$  40  $\mu$ M TPEN. B) WT or  $\Delta zrlA$  growth over time  $\pm$  40  $\mu$ M TPEN as determined by OD<sub>600</sub>. C) Growth of WT + vector,  $\Delta zrlA$  + vector, or  $\Delta zrlA$  + *pzrlAmyc* was monitored in the presence of 250  $\mu$ g/ml calprotectin. Graph depicts percent growth at eight hours compared to untreated strains. \*  $p < 0.05$  as determined by Student's *t* test from three independent experiments, mean  $\pm$  SD. D)  $\Delta zrlA$  + vector,  $\Delta zrlA$  + *pzrlAmyc* $\Delta_{Zn}$ , or  $\Delta zrlA$  + *pzrlAmyc* was monitored over time  $\pm$  40  $\mu$ M TPEN. Graph depicts percent growth at eight hours compared to untreated strains. \*\*\*\*  $p < 0.0001$  as determined by Student's *t* test from three independent experiments, mean  $\pm$  SD. E) Immunoblot on protein lysates from  $\Delta zrlA$  + vector,  $\Delta zrlA$  + *pzrlAmyc* $\Delta_{Zn}$ , or  $\Delta zrlA$  + *pzrlAmyc* (20  $\mu$ g protein/lane). F) *A. baumannii* strain ABUW5075 or a transposon mutant with an insertion in *zrlA* was grown  $\pm$  20  $\mu$ M TPEN. Graph depicts percent growth at eight hours compared to untreated strains. \*\*\*  $p < 0.001$  as determined by Student's *t* test from three independent experiments, mean  $\pm$  SD. G) Total cellular  $^{66}Zn$  was quantified in WT or  $\Delta zrlA$   $\pm$  250  $\mu$ g/ml calprotectin by ICP-MS. n.s. = no significant difference as determined by one-way ANOVA with Tukey multiple comparisons test from three independent experiments, mean  $\pm$  SD.

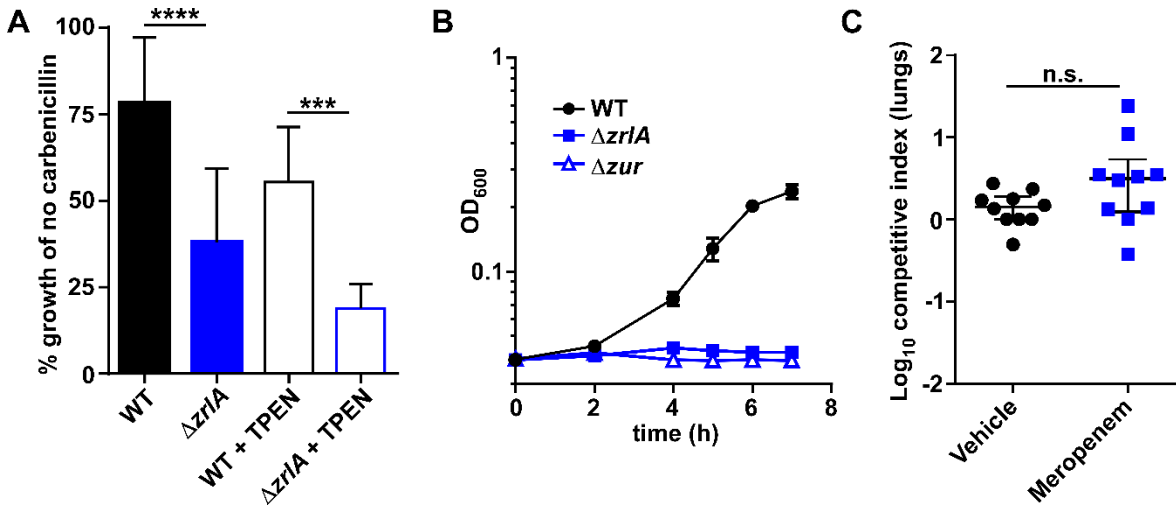

**Figure S4.** *zrlA* is required for overcoming antibiotic exposure. Related to Figure 4. A) WT or  $\Delta zrlA$  was grown with 3.125  $\mu\text{g/ml}$  carbenicillin  $\pm$  20  $\mu\text{M}$  TPEN with OD<sub>600</sub> monitored over time. Data depict growth at eight hours relative to no carbenicillin treatment. \*\*\*  $p < 0.001$ , \*\*\*\*  $p < 0.0001$  as determined by one-way ANOVA with Tukey multiple comparisons test from three independent experiments, mean  $\pm$  SD. B) WT,  $\Delta zur$ , or  $\Delta zrlA$  was grown in the presence of 6.25  $\mu\text{g/ml}$  carbenicillin with OD<sub>600</sub> monitored over time. C) Mice were intranasally infected with a 1:1 mixture of an unmarked and marked  $\Delta zrlA$  strain and intraperitoneally administered meropenem (12.5 mg/kg) or vehicle at 12 hour intervals post-infection ( $t = 0, 12, 24$  hpi). Data depict the competitive index of unmarked *zrlA* mutant: marked *zrlA* mutant in the lungs at 36 hpi. n.s. = no significant difference as determined by Student's *t* test ( $n = 10$ ).

## Supplemental Tables

**Table S1.** Descriptions for mucopeptide peak labeling depicted in Figure S2, and related to Figure 2. The theoretical masses were reported previously (Kuhner et al., 2014; Brown et al., 2012). The first letter indicates whether the mucopeptide is a monomer (M), or crosslinked dimer (D) or crosslinked trimer (T). The numbers indicate the number of amino acids of the peptide side chains from the donor to acceptor; G indicates glycine; (-GlcNAc) and (-Acetyl) indicates loss of GlcNAc or acetyl group. The difference column denotes the difference in experimental mass relative to the theoretical mass.

| UPLC peak | Muropeptide structure | Retention time in TIC (min) | Theoretical molecular mass | Theoretical m/z [M+H] <sup>+</sup> | Theoretical m/z [M+2H] <sup>2+</sup> | Theoretical m/z [M+3H] <sup>3+</sup> | Experimental m/z [M+xH] <sup>x+</sup> | Difference |
|-----------|-----------------------|-----------------------------|----------------------------|------------------------------------|--------------------------------------|--------------------------------------|---------------------------------------|------------|
| 1         | M3                    | 9.54                        | 870.36                     | 871.37                             |                                      |                                      | 871.370                               | 0.000      |
| 1         | M3(-GlcNAc)           | 9.54                        | 667.29                     | 668.30                             |                                      |                                      | 668.299                               | 0.000      |
| 2         | M3G                   | 10.18                       | 927.38                     | 928.39                             |                                      |                                      | 928.395                               | 0.005      |
| 2         | M3G(-GlcNAc)          | 10.20                       | 724.31                     | 725.32                             |                                      |                                      | 725.316                               | -0.005     |
| 3         | M4G(-GlcNAc)          | 12.34                       | 795.35                     | 796.36                             |                                      |                                      | 796.349                               | -0.009     |
| 3         | M4G                   | 12.39                       | 998.43                     | 999.44                             |                                      |                                      | 999.414                               | -0.023     |
| 4         | M4                    | 13.75                       | 941.39                     | 942.40                             |                                      |                                      | 942.397                               | -0.003     |
| 4         | M4(-GlcNAc)           | 13.76                       | 738.33                     | 739.34                             |                                      |                                      | 739.335                               | -0.001     |
| 5         | M43                   | 17.45                       | 1313.56                    | 1314.57                            | 657.79                               |                                      | 657.791                               | 0.002      |
| 6         | M44                   | 19.12                       | 1384.59                    | 1385.60                            | 693.30                               |                                      | 693.306                               | 0.002      |
| 7         | D34D and D43          | 25.34                       | 1793.75                    | 1794.76                            | 897.88                               |                                      | 897.877                               | -0.007     |
| 8         | D44                   | 26.72                       | 1864.79                    | 1865.80                            | 933.40                               |                                      | 933.401                               | -0.003     |
| 9         | T444                  | 32.8                        | 2788.19                    | 2789.20                            |                                      | 930.41                               | 930.390                               | -0.015     |
| 10        | anhydroD44            | 35.97                       | 1844.78                    | 1845.79                            | 923.40                               |                                      | 923.388                               | -0.009     |

**Table S2.** Oligonucleotides used in this study. Related to Figures 1 and 2 and STAR Methods.

| Name                                                    | Sequence (5' to 3')                                                                                                                                           | Description                                               |
|---------------------------------------------------------|---------------------------------------------------------------------------------------------------------------------------------------------------------------|-----------------------------------------------------------|
| <b><i>zrIA</i> mutant construction and confirmation</b> |                                                                                                                                                               |                                                           |
| 3412FL1For                                              | CCCGGGAGAGTAAGTGCAATTG                                                                                                                                        | Cloning into pFLP2, 5' flank, forward                     |
| 3412FL1Rev                                              | CTCCTAGTTAGTCACATATGACGCTTCA<br>TAAATATATTC                                                                                                                   | Cloning into pFLP2, 5' flank, reverse                     |
| 3412FL2For                                              | AGGGAATAATGACATATGGGACTATAAA<br>AGCAATTT                                                                                                                      | Cloning into pFLP2, 3' flank, forward                     |
| 3412FL2Rev                                              | CCCGGGTTGTGACCATGAATAAG                                                                                                                                       | Cloning into pFLP2, 3' flank, reverse                     |
| 3412KanFor                                              | GAATATATTTATGAAGCGTCATATGTGA<br>CTAACTAGGAG                                                                                                                   | Cloning into pFLP2 for Km cassette from pUC18-k1, forward |
| 3412KanRev                                              | AAATTGCTTTTATAGTCCCATATGTCATT<br>ATTCCCT                                                                                                                      | Cloning into pFLP2 for Km cassette from pUC18-k1, reverse |
| 3412_KO_F                                               | cgtccttttttatttttaaaatttacaacagaaattaaaggatt<br>taataattgttatattataacatttctgaaattaaatgattaa<br>ggctccagatgtttaggaagatagaatatatttGTG<br>TAG GCT GGA GCT GCT TC | To generate unmarked <i>zrIA</i> mutant, forward          |
| 3412_KO_R                                               | tgccagatcacaggcgaatctatttctaaaccacaataa<br>tgttatgttataacataactattgatcaagttttattctagttta<br>tctaagccaaatcacttagtgttgaaaaaattgctCAT<br>ATG AAT ATC CTC CTT AG  | To generate unmarked <i>zrIA</i> mutant, forward          |
| 3412ExtR                                                | GACCAGCTCTGCCAAACTTGC                                                                                                                                         | External to <i>zrIA</i> for Tn insertion confirmation     |
| Pgro-172                                                | TGAGCTTTTTAGCTCGACTAATCCAT                                                                                                                                    | T26 transposon-specific                                   |
| <b><i>zrIA</i> complementation</b>                      |                                                                                                                                                               |                                                           |
| 3412mycFor                                              | GGATTCATGGTGGCTTATCAATTTAAGC<br>GCCG                                                                                                                          | Cloning into pWH1266, forward                             |
| 3412mycRev                                              | GGATTCTTATAGATCTTCTTCAGATATCA<br>G TTTCTGTTCTAGTCCCTGACAAAT                                                                                                   | Cloning into pWH1266, reverse with cMyc tag               |
|                                                         |                                                                                                                                                               |                                                           |
| <b>qRT-PCR</b>                                          |                                                                                                                                                               |                                                           |
| r01RTf                                                  | CTGTAGCGGGTCTGAGAGGAT                                                                                                                                         | <i>A1S_r01</i> (16S), forward                             |
| r01RTr                                                  | CCATAAGGCCTTCTTCACAC                                                                                                                                          | <i>A1S_r01</i> (16S), reverse                             |
| 3412RTf                                                 | CGCAACTGCAGATCACAGAC                                                                                                                                          | <i>zrIA</i> , forward                                     |
| 3412RTr                                                 | GGAAGTGCCTAAGGCTCAAC                                                                                                                                          | <i>zrIA</i> , reverse                                     |
| A1S_2479_RTFor                                          | CAATGCCGGATCATTACACGACAG                                                                                                                                      | <i>A1S_2479</i> , forward                                 |
| A1S_2479_RTRev                                          | AACCTGCTGCTTTGGTATAGCCAG                                                                                                                                      | <i>A1S_2479</i> , reverse                                 |
| A1S_2435_RTFor                                          | ATGAACGAATCTGCTTGGTGTAAGGC                                                                                                                                    | <i>A1S_2435</i> , forward                                 |
| A1S_2435_RTRev                                          | CCTTCATTCCAGCAATATGTTTCAGCC                                                                                                                                   | <i>A1S_2435</i> , reverse                                 |
| A1S_1248_RTFor                                          | CCACCTAAAGTTGAACCTGCTTCCTAT                                                                                                                                   | <i>A1S_1248</i> , forward                                 |
| A1S_1248_qRTRev                                         | TCTGCCAATCACGAGCGGATCTTAATA                                                                                                                                   | <i>A1S_1248</i> , reverse                                 |
|                                                         |                                                                                                                                                               |                                                           |
| <b>Protein purification</b>                             |                                                                                                                                                               |                                                           |
| 3412-sspMAL_fwd                                         | gcgccgcatatcgtcgacAGTACTCAAACAC<br>CCCAGC                                                                                                                     | Cloning into pMAL-c5X, forward                            |

|                            |                                                                                     |                                   |
|----------------------------|-------------------------------------------------------------------------------------|-----------------------------------|
|                            |                                                                                     |                                   |
| 3412-sspMAL_rev            | cctgcaggggaattcggatccTTATAGTCCCTGAC<br>AAATTGAG                                     | Cloning into pMAL-c5X,<br>reverse |
| ZrIA <sup>42C</sup> -F     | CAACGACCGAAAACCTGTATTTTCAGGG<br>CGCCATGGA<br>TAAACAACAGCCT GAAGATTAT                | Cloning into pET-22b,<br>forward  |
| ZrIA <sup>42C</sup> -R     | CACTAGTTGAGCTCGTCGACGTAGGCC<br>TTTGAATTCTT<br>ATAGTCCCTGACAAATTGAGGT                | Cloning into pET-22b,<br>reverse  |
| A1S_1248 <sup>56C</sup> -F | GCCGGCGATGGCCATGGATAAAGTTGA<br>ACCTGCTTCCTAT                                        | Cloning into pET-22b,<br>forward  |
| A1S_1248 <sup>56C</sup> -R | CGG CCG CAA GCT TGT CGA CGG AGC<br>TCG AAT TCT TAG AAA TTA CAC ATT<br>GAC GTA TTG C | Cloning into pET-22b,<br>reverse  |
